# Supplementary material for: Verbeter de zorg voor patiënten met beperkte gezondheidsvaardigheden: geleerde lessen uit de dagelijkse huisartsenpraktijk
Source: Springer Nature journal article supplement (doi:10.1007/s12508-021-00312-z), 2021-08-01
Supplement: MOESM1 [file 19567250]

## Bijlage 3 Werkbladen

De werkbladen zijn voor de projectleider om samen met de projectgroep de juiste stappen te zetten en deze te monitoren. Doel is om het kort-cyclisch werken te stimuleren via de Plan-Do-Check-Act-cyclus. Door elk overleg de werkbladen erbij te pakken en terug- en vooruit te kijken, leert de projectgroep waar al successen zijn geboekt en waar nog aandacht voor nodig is. Het is een suggestie om het op deze manier aan te pakken, daar waar gewenst kunnen eigen aanpassingen of toevoegingen worden gedaan. Het werkblad kan tevens gebruikt worden ter verantwoording naar de manager of financier.

## Bijlage 3 Werkblad 1

### Ervaringen en inzichten binnen de eigen discipline.

A

Lees vooraf de handout over gezondheidsvaardigheden. Wat valt je op?

plak hier je post-it!

B

Wat willen we bereiken voor deze groep?

plak hier je post-it!

C

Wat hebben we daarvoor nodig?

Bijvoorbeeld:

- kennis
- vaardigheden
- materiaal
- samenwerking
- financiën
- welke patiënten in de projectgroep?

plak hier je post-it!

D

Wie gaat in de projectgroep?

- welke patiënten in de projectgroep?

plak hier je post-it!

## Bijlage 3 Werkblad 2

### Maak een teamplan met de projectgroep

Bepaal vooraf de multidisciplinaire samenstelling en vul samen de vragen in:

A. Wat is de rol van de projectgroep?

---

---

B. Welke mensen met lage gezondheidsvaardigheden gaan we uitnodigen voor de projectgroep? En hoe doen we dat?

---

---

C. Hoe betreft elke discipline de achterban/collega's?

---

---

D. Wat wil de projectgroep bereiken? Hoe kunnen we zorgen dat...

---

---

E. Wat heeft de projectgroep nodig?

---

---

### Bijlage 3 Werkblad 3

**Bepaal de (eerste) stap(pen) waar de projectgroep mee aan de slag gaat.**

Kies gezamenlijk 1 of 2 stappen voor de komende periode (bijv. 6 weken)

Voor een toelichting op de stappen, zie handreiking

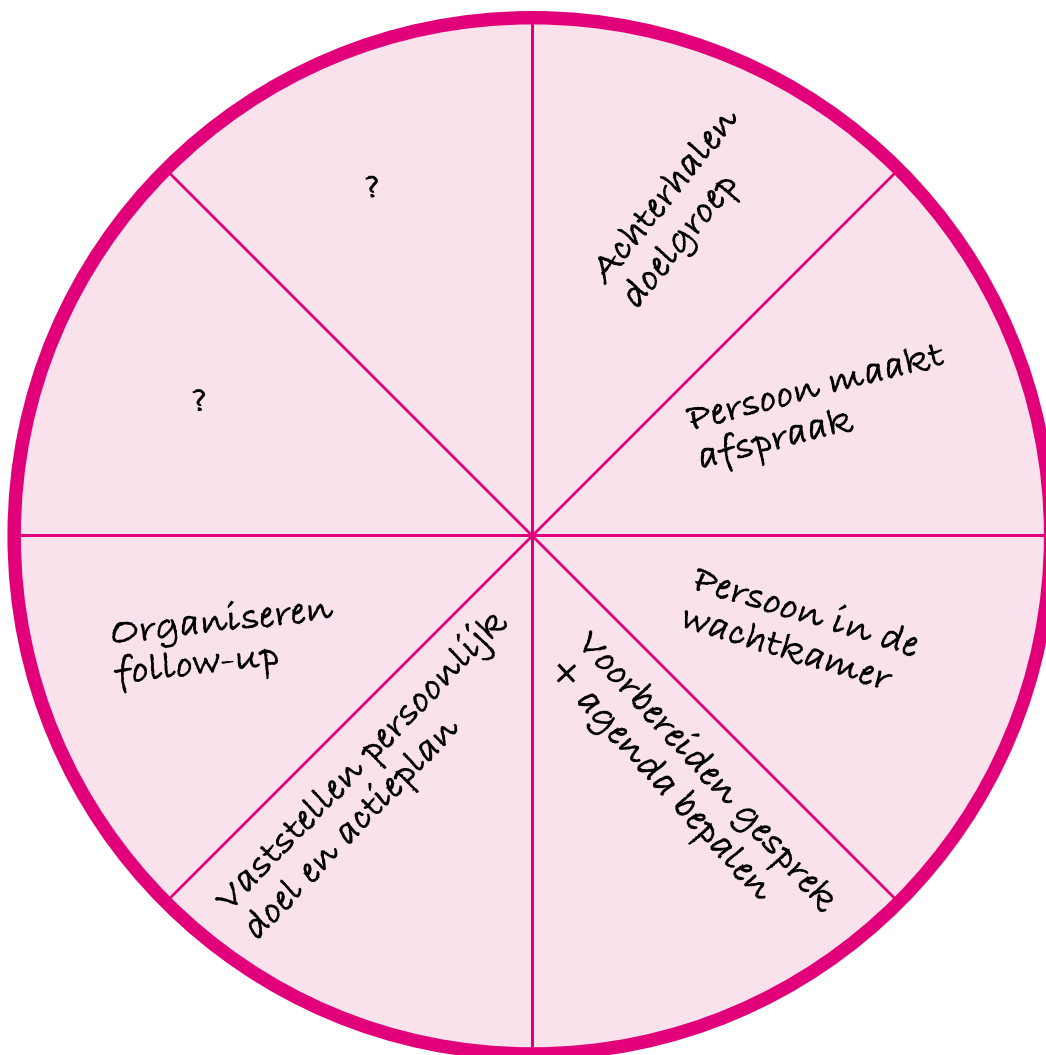

Waar zit energie om mee te starten?

Herhaal dit totdat alle stappen aan bod zijn geweest.

### Bijlage 3 Werkblad 4

**Voortgang per stap. NB. Van dit werkblad kan je er meerdere tegelijk gebruiken als je aan meerdere stappen tegelijk werkt.**

Bespreken voortgang  
gekozen stap

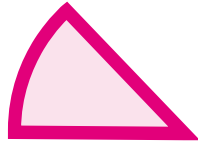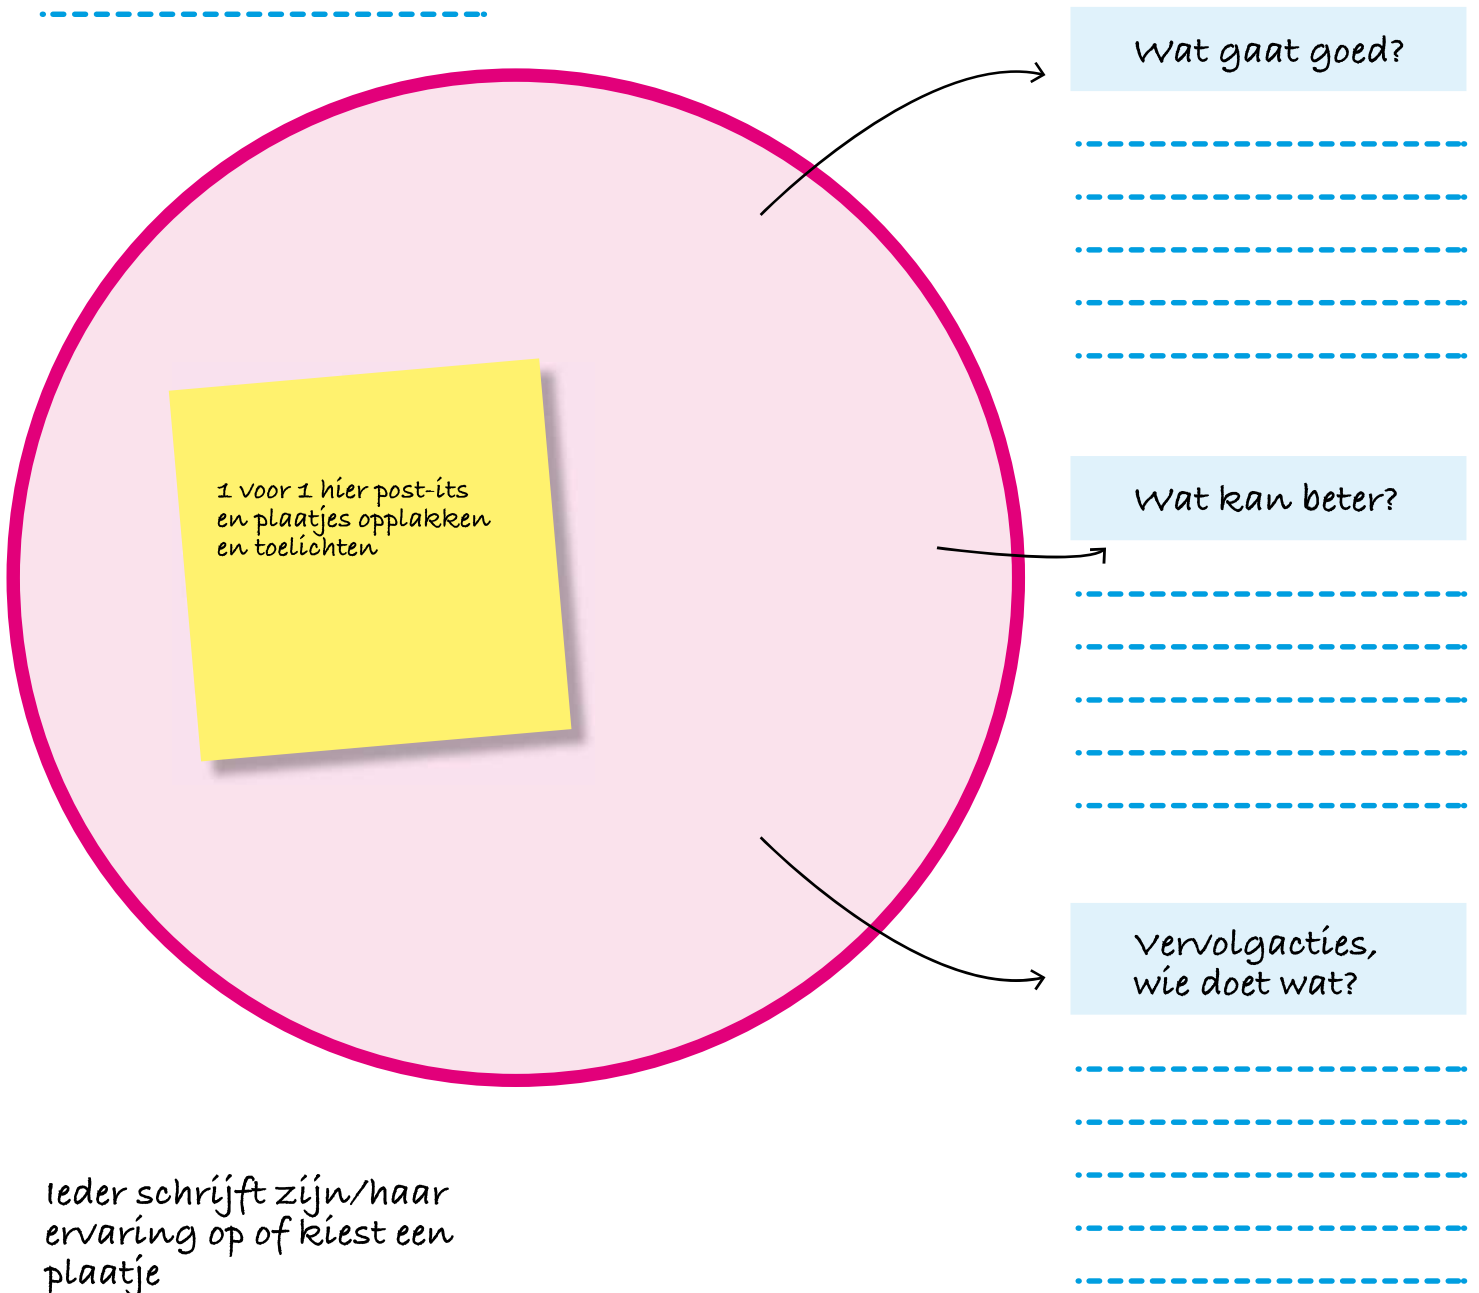

Ieder schrijft zijn/haar  
ervaring op of kiest een  
plaatje

## Bijlage 3 Werkblad 5

### Evalueren met je projectgroep en vooruitkijken.

Beantwoord de volgende vragen:

A. Hoe hebben we samengewerkt?

.....

.....

.....

B. Onze projectgroep is succesvol geweest in:

.....

.....

.....

C. Wat is merkbaar / zichtbaar veranderd?

.....

.....

.....

D. Hoe willen we verder? Als projectgroep of ....

.....

.....

.....

E. Hoe blijven we samenwerken met mensen met lage gezondheidsvaardigheden?

.....

.....
